# Supplementary material for: Effectiveness of Chest Physiotherapy in Infants Hospitalized with Acute Bronchiolitis: A Multicenter, Randomized, Controlled Trial
Source: PLoS Med. 2010 Sep 28;7(9):e1000345. doi: 10.1371/journal.pmed.1000345 (PMC2946956; doi:10.1371/journal.pmed.1000345)
Supplement: Text S2 — CONSORT checklist. (0.11 MB PDF) [file pmed.1000345.s003.pdf]

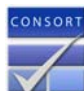

# CONSORT Statement 2001 Checklist

## Items to include when reporting a randomized trial

| PAPER SECTION<br>And topic                 | Item | Descriptor                                                                                                                                                                                                                                                                                                                                                                                                                                                                                                                                                                                   | Reported on<br>Page # |
|--------------------------------------------|------|----------------------------------------------------------------------------------------------------------------------------------------------------------------------------------------------------------------------------------------------------------------------------------------------------------------------------------------------------------------------------------------------------------------------------------------------------------------------------------------------------------------------------------------------------------------------------------------------|-----------------------|
| TITLE & ABSTRACT                           | 1    | <u>How participants were allocated to interventions</u> : "randomized", or "randomly assigned").                                                                                                                                                                                                                                                                                                                                                                                                                                                                                             | 1 – 2                 |
| INTRODUCTION<br>Background                 | 2    | <u>Scientific background and explanation of rationale.</u>                                                                                                                                                                                                                                                                                                                                                                                                                                                                                                                                   | 4 – 5                 |
| METHODS<br>Participants                    | 3    | <u>Eligibility criteria for participants</u> and the <u>settings and locations where the data were collected.</u>                                                                                                                                                                                                                                                                                                                                                                                                                                                                            | 6                     |
| Interventions                              | 4    | <u>Precise details of the interventions intended for each group and how and when they were actually administered.</u> <ul style="list-style-type: none"><li>- Precise details of both the experimental treatment and comparator</li><li>- Description of the different components of the interventions and, when applicable, descriptions of the procedure for tailoring the interventions to individual participants</li><li>- Details of how the interventions were standardized</li><li>- Details of how adherence of care providers with the protocol was assessed or enhanced</li></ul> | 7 – 9                 |
| Objectives                                 | 5    | <u>Specific objectives and hypotheses.</u>                                                                                                                                                                                                                                                                                                                                                                                                                                                                                                                                                   | 5                     |
| Outcomes                                   | 6    | <u>Clearly defined primary and secondary outcome measures</u> and, when applicable, any <u>methods used to enhance the quality of measurements</u> (e.g., multiple observations, training of assessors).                                                                                                                                                                                                                                                                                                                                                                                     | 10                    |
| Sample size                                | 7    | <u>How sample size was determined</u> and, when applicable, <u>explanation of any interim analyses and stopping rules.</u>                                                                                                                                                                                                                                                                                                                                                                                                                                                                   | 10 – 11               |
| Randomization --<br>Sequence generation    | 8    | <u>Method used to generate the random allocation sequence, including details of any restrictions</u> (e.g., blocking, stratification)                                                                                                                                                                                                                                                                                                                                                                                                                                                        | 7                     |
| Randomization --<br>Allocation concealment | 9    | <u>Method used to implement the random allocation sequence</u> (e.g., numbered containers or central telephone), clarifying whether the sequence was concealed until interventions were assigned.                                                                                                                                                                                                                                                                                                                                                                                            | 7                     |
| Randomization --<br>Implementation         | 10   | <u>Who generated the allocation sequence, who enrolled participants, and who assigned participants to their groups.</u>                                                                                                                                                                                                                                                                                                                                                                                                                                                                      | 7                     |
| Blinding (masking)                         | 11   | <u>Whether or not participants, those administering the interventions, and those assessing the outcomes were blinded to group assignment.</u> If done, <u>how the success of blinding was evaluated.</u> If blinded, method of blinding and description of the similarity of interventions                                                                                                                                                                                                                                                                                                   | 7                     |
| Statistical methods                        | 12   | <u>Statistical methods used to compare groups for primary outcome(s); Methods for additional analyses</u> , such as subgroup analyses and adjusted analyses.                                                                                                                                                                                                                                                                                                                                                                                                                                 | 11 – 12               |
| RESULTS<br>Participant flow                | 13   | <u>Flow of participants through each stage</u> (a diagram is strongly recommended). Specifically, for each group report the numbers of participants randomly assigned, receiving intended treatment, completing the study protocol, and analyzed for the primary outcome. <u>Describe protocol deviations from study as planned, together with reasons.</u>                                                                                                                                                                                                                                  | Figure 1              |
| Recruitment                                | 14   | <u>Dates defining the periods of recruitment and follow-up.</u>                                                                                                                                                                                                                                                                                                                                                                                                                                                                                                                              | 13                    |
| Baseline data                              | 15   | <u>Baseline demographic and clinical characteristics of each group.</u>                                                                                                                                                                                                                                                                                                                                                                                                                                                                                                                      | 13                    |
| Numbers analyzed                           | 16   | <u>Number of participants (denominator) in each group included in each analysis and whether the analysis was by "intention-to-treat".</u> State the results in absolute numbers when feasible (e.g., 10/20, not 50%).                                                                                                                                                                                                                                                                                                                                                                        | 13                    |
| Outcomes and<br>estimation                 | 17   | <u>For each primary and secondary outcome, a summary of results for each group, and the estimated effect size and its precision</u> (e.g., 95% confidence interval).                                                                                                                                                                                                                                                                                                                                                                                                                         | 13 – 14               |
| Ancillary analyses                         | 18   | <u>Address multiplicity by reporting any other analyses performed</u> , including subgroup analyses and adjusted analyses, indicating those pre-specified and those exploratory.                                                                                                                                                                                                                                                                                                                                                                                                             | 13 – 14               |
| Adverse events                             | 19   | <u>All important adverse events or side effects in each intervention group.</u>                                                                                                                                                                                                                                                                                                                                                                                                                                                                                                              | –                     |
| DISCUSSION<br>Interpretation               | 20   | <u>Interpretation of the results</u> , taking into account study hypotheses, sources of potential bias or imprecision and the dangers associated with multiplicity of analyses and outcomes.                                                                                                                                                                                                                                                                                                                                                                                                 | 15 – 18               |
| Generalizability                           | 21   | <u>Generalizability (external validity) of the trial findings.</u>                                                                                                                                                                                                                                                                                                                                                                                                                                                                                                                           | 18                    |
| Overall evidence                           | 22   | <u>General interpretation of the results in the context of current evidence.</u>                                                                                                                                                                                                                                                                                                                                                                                                                                                                                                             | 18                    |
